# Supplementary material for: Molecular Subtypes in Stage II-III Colon Cancer Defined by Genomic Instability: Early Recurrence-Risk Associated with a High Copy-Number Variation and Loss of RUNX3 and CDKN2A
Source: PLoS One. 2015 Apr 16;10(4):e0122391. doi: 10.1371/journal.pone.0122391 (PMC4399912; doi:10.1371/journal.pone.0122391)
Supplement: S1 Data — (XLSX) [file pone.0122391.s001.xlsx]

## Sheet: Raw data
Patient sample ID	01-025128720 - RUNX3-2 [HHA1]	01-025128920 - RUNX3-2 [HHA1]	01-025129597 - RUNX3-2 [HHA1]	03-037009360 - MLH1-1 [HHA1]	03-037009621 - MLH1-1 [HHA1]	03-037009760 - MLH1-1 [HHA1]	03-037010228 - MLH1-1 [HHA1]	05-134898938 - NEUROG1-1 [HHA1]	05-134899244 - NEUROG1-1 [HHA1]	05-134899351 - NEUROG1-1 [HHA1]	05-134899479 - NEUROG1-1 [HHA1]	05-134899537 - NEUROG1-1 [HHA1]	05-134899663 - NEUROG1-1 [HHA1]	07-140099560 - BRAF-15 (MUT)	09-021964677 - CDKN2A-2a [HHA1]	09-021965200 - CDKN2A-2a [HHA1]	09-021984268 - CDKN2A-1 [HHA1]	09-021985276 - CDKN2A-up [HHA1]	11-002117594 - IGF2-4 [HHA1]	11-002118681 - IGF2-3 [HHA1]	11-002118895 - IGF2-3 [HHA1]	15-076419820 - CRABP1-1 [HHA1]	15-076420033 - CRABP1-1 [HHA1]	15-076420493 - CRABP1-2 [HHA1]	15-076420701 - CRABP1-2 [HHA1]	16-011256544 - SOCS1-2 [HHA1]	16-011256960 - SOCS1-2 [HHA1]	16-011257200 - SOCS1-1 [HHA1]	16-011257552 - SOCS1-1 [HHA1]	17-045993509 - CACNA1G-1 [HHA1]	17-045993744 - CACNA1G-1 [HHA1]	17-045993972 - CACNA1G-1 [HHA1]	17-057295679 - BRIP1-1 [HHA1]	01-117465104 - Reference C/M*	02-032141273 - Reference C/M*	02-095311420 - Reference C/M*	02-203086688 - Reference C/M*	03-008762427 - Reference C/M*	03-087391826 - Reference C/M*	06-145998122 - Reference C/M*	09-071040778 - Reference C/M*	10-070936625 - Reference C/M*	10-124142683 - Reference C/M*	12-038037306 - Reference C/M*	DIG_01-025128720 - RUNX3-2 [HHA1]	DIG_01-025128920 - RUNX3-2 [HHA1]	DIG_01-025129597 - RUNX3-2 [HHA1]	DIG_03-037009360 - MLH1-1 [HHA1]	DIG_03-037009621 - MLH1-1 [HHA1]
SUS_006	0.57	0.61	0.67	0.93	0.96	1.04	1.12	0.84	0.73	0.74	0.79	0.77	0.81	0.00	0.76	0.88	0.75	0.79	0.63	0.54	0.68	0.79	0.73	0.73	0.77	0.72	0.83	0.68	0.71	0.58	0.61	0.66	0.96	0.84	0.82	0.68	1.00	0.86	1.58	1.57	1.11	0.80	1.26	1.07	0.00	0.00	0.00	0.00	0.00
SUS_007	0.63	0.66	0.72	0.91	0.89	1.01	1.05	0.83	0.75	0.86	0.74	0.74	0.84	0.00	0.87	0.91	0.79	0.83	0.61	0.56	0.68	0.83	0.75	0.77	0.77	0.80	0.82	0.74	0.68	0.70	0.72	0.77	0.89	0.79	0.82	0.71	1.00	0.87	1.41	1.57	1.11	0.82	1.20	1.02	27%	25%	25%	46%	58%
Caco2 2_1	0.49	0.53	0.52	0.77	0.78	0.82	0.82	0.90	0.82	0.92	0.85	0.91	0.91	0.00	0.47	0.47	0.37	0.39	0.86	0.92	1.06	0.70	0.64	0.76	0.70	0.76	0.76	0.66	0.56	1.34	1.45	1.54	0.86	0.37	0.88	0.74	1.12	0.78	1.00	1.37	0.29	1.46	1.20	1.16	28%	0.00	71%	0.00	0.00
SUS_010	0.64	0.66	0.70	0.90	0.98	1.09	1.14	0.83	0.75	0.76	0.82	0.76	0.83	1.00	0.79	0.87	0.79	0.79	0.68	0.63	0.76	0.80	0.75	0.76	0.77	0.79	0.88	0.74	0.79	0.63	0.69	0.73	0.96	0.87	0.77	0.77	1.00	0.97	1.42	1.44	1.18	0.90	1.24	1.04	60%	53%	34%	0.00	0.00
SUS_011	0.59	0.58	0.62	0.86	0.93	0.96	1.03	0.76	0.70	0.77	0.67	0.68	0.80	1.00	0.77	0.84	0.73	0.80	0.57	0.64	0.66	0.77	0.70	0.70	0.70	0.62	0.73	0.68	0.53	0.61	0.60	0.71	0.92	0.81	0.85	0.77	1.04	0.95	1.38	1.43	1.11	0.82	1.21	0.98	67%	67%	65%	62%	83%
SUS_012	0.78	0.80	0.83	0.89	0.92	0.97	0.96	0.91	0.82	0.88	0.89	0.86	0.86	0.00	0.78	0.89	0.80	0.79	1.09	0.98	1.18	0.86	0.84	0.84	0.83	0.99	1.13	1.01	0.83	1.02	1.04	1.10	1.08	0.84	1.00	0.96	1.08	0.92	1.10	1.33	1.07	0.92	1.03	0.87	0.00	0.00	15%	0.00	0.00
SUS_013	0.66	0.60	0.69	0.96	0.97	1.00	1.12	0.85	0.75	0.86	0.76	0.77	0.87	1.00	0.83	0.90	0.81	0.82	0.63	0.66	0.74	0.81	0.79	0.78	0.75	0.74	0.76	0.72	0.71	0.70	0.67	0.78	0.96	0.87	0.85	0.76	0.99	1.00	1.44	2.10	1.24	0.87	1.26	1.06	94%	99%	92%	90%	85%
SUS_019	1.17	1.15	1.17	1.08	1.13	0.95	1.00	0.92	1.02	0.93	1.03	1.05	0.94	0.00	0.84	0.84	0.91	0.84	1.21	1.37	1.26	1.15	1.20	1.20	1.20	1.13	1.20	1.30	1.06	1.30	1.29	1.27	0.90	0.98	1.09	1.44	1.01	1.13	0.93	0.99	0.95	1.08	0.84	0.81	0.00	0.00	0.00	0.00	0.00
SUS_022	0.82	0.83	0.86	0.96	1.03	0.98	1.01	0.84	0.82	0.79	0.99	0.91	0.81	0.00	0.80	0.86	0.89	0.77	0.77	0.78	0.82	0.79	0.82	0.87	0.84	0.93	1.05	0.90	0.98	0.77	0.83	0.81	0.97	0.88	0.78	0.94	1.02	0.96	1.15	1.11	1.13	0.92	1.05	0.99	0.00	0.00	2%	0.00	0.00
SUS_024	0.61	0.60	0.60	0.94	1.00	1.08	1.09	0.70	0.65	0.66	0.65	0.68	0.66	0.00	0.78	0.85	0.82	0.80	0.75	0.79	0.85	0.55	0.52	0.55	0.52	1.38	1.64	1.39	1.46	0.74	0.73	0.82	0.98	0.73	0.81	0.79	1.02	1.02	1.29	1.37	1.19	0.77	1.01	1.01	0.00	0.00	0.00	0.00	0.00
SUS_028	0.56	0.61	0.58	0.94	0.97	1.13	1.11	0.85	0.74	0.79	0.78	0.70	0.78	0.00	0.85	0.86	0.79	0.83	0.69	0.62	0.74	0.68	0.63	0.64	0.62	0.72	0.85	0.72	0.66	0.68	0.72	0.74	0.93	0.84	0.80	0.75	0.99	0.98	1.55	1.49	1.28	0.88	1.27	1.09	0.00	0.00	6%	0.00	0.00
SUS_029	0.76	0.78	0.75	1.07	1.10	1.16	1.18	0.80	0.77	0.80	0.73	0.73	0.81	0.00	0.96	1.00	0.92	0.98	0.73	0.71	0.75	0.79	0.77	0.78	0.78	0.84	0.97	0.89	0.61	0.79	0.75	0.79	0.98	0.80	0.97	0.87	1.12	1.11	1.30	1.20	0.77	0.86	1.03	1.01	0.00	0.00	3%	0.00	0.00
SUS_031	0.80	0.82	0.82	0.98	1.02	1.08	1.12	0.82	0.76	0.80	0.78	0.77	0.84	0.00	0.79	0.91	0.84	0.82	0.89	0.85	0.96	0.80	0.75	0.80	0.77	0.86	1.03	0.86	0.81	0.82	0.84	0.88	0.92	0.82	0.79	0.79	0.87	1.01	1.45	1.21	1.11	0.91	1.08	1.13	35%	36%	35%	43%	50%
SUS_035	0.87	0.85	0.86	0.94	0.87	0.98	0.95	0.81	0.79	0.86	0.82	0.85	0.83	1.00	0.80	0.84	0.88	0.84	0.85	0.80	0.89	0.79	0.84	0.84	0.85	0.92	0.91	0.86	0.96	0.88	0.88	0.87	0.89	0.86	0.84	0.88	1.03	0.92	1.26	1.31	1.08	0.92	1.08	0.99	61%	67%	68%	60%	92%
SUS_036	0.77	0.76	0.98	0.96	0.70	1.49	1.22	0.96	0.71	0.91	0.66	0.69	0.94	0.00	0.94	0.99	0.73	0.84	1.05	0.72	1.25	0.97	0.83	0.90	0.87	1.14	1.47	0.87	1.05	1.02	1.01	1.09	0.68	0.73	1.17	0.69	1.06	0.79	1.77	1.43	0.69	0.69	1.23	1.00	0.00	0.00	5%	0.00	0.00
SUS_040	0.59	0.59	0.62	0.79	0.79	0.89	0.85	0.77	0.73	0.78	0.75	0.77	0.79	1.00	0.88	0.91	0.86	0.87	0.70	0.73	0.75	0.79	0.74	0.77	0.76	0.79	0.84	0.76	0.71	0.71	0.71	0.72	0.85	0.70	0.84	0.86	1.05	0.81	1.02	1.27	1.22	0.90	1.14	1.05	41%	40%	37%	36%	73%
SUS_041	0.78	0.81	0.75	1.01	1.00	1.03	1.00	0.83	0.80	0.85	0.85	0.86	0.85	0.00	0.84	0.86	0.84	0.83	0.76	0.78	0.82	0.57	0.58	0.58	0.62	0.85	0.94	0.84	0.77	0.78	0.82	0.79	0.92	0.88	0.81	0.82	1.05	1.01	1.25	1.30	1.16	0.93	1.11	0.97	32%	41%	64%	0.00	0.00
SUS_043	0.56	0.48	0.52	1.09	1.01	1.36	1.24	0.90	0.86	0.96	0.74	0.80	0.92	0.00	0.98	1.00	0.84	1.01	1.15	1.15	1.29	0.79	0.74	0.76	0.76	0.88	1.09	0.85	0.86	0.78	0.73	0.83	0.77	0.90	0.86	0.65	0.96	1.01	1.49	1.30	1.30	0.77	1.27	1.09	0.00	0.00	0.00	2%	0.00
SUS_044	0.99	0.92	0.98	0.92	0.91	0.93	0.91	0.87	0.83	0.95	0.81	0.88	0.91	1.00	0.90	0.96	0.94	0.91	0.95	1.03	1.02	0.89	0.90	0.88	0.92	1.03	1.14	0.98	0.94	1.04	1.07	1.02	0.92	0.85	1.00	0.95	1.03	0.90	1.21	1.30	1.04	0.88	1.09	0.99	47%	52%	45%	49%	24%
SUS_045	0.82	0.84	0.91	0.93	0.87	1.07	1.05	0.97	0.87	0.98	0.79	0.93	1.02	1.00	1.08	1.03	0.78	0.91	0.88	0.84	1.10	0.97	0.94	1.04	0.97	0.96	1.14	0.93	0.69	0.91	0.90	1.04	0.86	0.78	1.10	0.89	1.10	0.88	1.37	1.23	0.98	0.87	1.22	1.00	63%	57%	54%	53%	72%
SUS_051	0.76	0.76	0.72	1.10	1.14	1.04	1.08	0.71	0.70	0.68	0.78	0.76	0.68	0.00	0.83	0.86	0.95	0.86	0.89	0.99	0.96	0.70	0.72	0.76	0.71	0.95	1.01	1.05	0.89	0.72	0.74	0.71	0.79	0.99	0.90	0.98	1.13	1.11	1.22	1.31	1.17	0.80	0.86	0.76	0.00	0.00	0.00	0.00	0.00
SUS_053	0.79	0.74	0.73	0.89	0.89	0.91	0.88	0.70	0.70	0.71	0.76	0.76	0.72	1.00	0.73	0.78	0.79	0.71	0.68	0.70	0.71	0.78	0.79	0.82	0.81	0.81	0.86	0.82	0.87	0.76	0.73	0.75	0.93	0.85	0.73	0.79	1.00	1.05	1.09	1.17	1.16	0.94	1.07	0.90	69%	72%	68%	69%	115%
SUS_056	0.65	0.70	0.66	0.95	0.99	0.98	0.98	0.57	0.56	0.53	0.60	0.60	0.57	0.00	0.73	0.78	0.78	0.70	0.63	0.69	0.66	0.78	0.80	0.80	0.82	0.47	0.53	0.50	0.46	0.66	0.65	0.67	0.78	0.75	0.76	0.84	1.02	0.96	1.11	1.04	1.11	0.85	1.02	1.14	32%	41%	52%	28%	0.00
SUS_057	0.97	1.01	0.92	0.97	1.02	1.04	1.02	0.90	0.86	0.83	0.94	0.92	0.86	0.00	0.84	0.91	0.87	0.81	1.00	1.05	1.09	0.90	0.92	0.91	0.91	1.25	1.50	1.30	1.30	0.97	0.96	0.98	1.24	0.86	0.93	0.96	1.03	0.97	1.18	1.07	1.09	0.97	1.08	0.93	0.00	3%	3%	0.00	0.00
SUS_059	0.83	0.80	0.78	1.05	0.64	1.13	1.10	1.12	1.15	1.21	1.10	1.17	1.18	0.00	0.91	0.90	0.88	0.91	0.61	0.65	0.71	0.93	0.92	0.91	0.93	0.85	0.89	0.78	0.81	0.81	0.80	0.78	0.92	0.74	0.88	0.80	1.13	0.54	1.32	1.46	0.99	0.98	1.32	1.51	0.00	30%	41%	34%	0.00
SUS_060	0.60	0.64	0.60	0.91	0.87	0.97	0.93	0.76	0.74	0.75	0.76	0.75	0.77	0.00	0.77	0.82	0.80	0.79	0.67	0.64	0.69	0.62	0.62	0.67	0.66	0.83	0.94	0.87	0.65	0.71	0.70	0.72	0.82	0.92	0.90	0.89	1.06	0.90	1.26	1.52	1.03	0.83	1.03	1.09	0.00	0.00	7%	0.00	0.00
SUS_061	0.81	0.76	0.82	0.87	0.87	0.83	0.87	0.77	0.83	0.83	0.81	0.83	0.82	0.00	0.69	0.68	0.74	0.70	0.78	0.91	0.89	0.68	0.70	0.69	0.68	0.68	0.68	0.74	0.66	0.92	0.92	0.90	0.84	0.78	1.07	1.15	1.26	0.86	0.98	0.90	0.97	1.07	1.12	0.87	30%	31%	37%	0.00	0.00
SUS_064	0.68	0.66	0.63	0.97	1.00	0.92	0.91	0.64	0.70	0.72	0.70	0.73	0.69	0.00	0.78	0.72	0.78	0.73	0.51	0.62	0.58	0.69	0.71	0.73	0.71	0.66	0.64	0.70	0.53	0.66	0.64	0.61	0.93	0.82	0.69	0.71	1.00	1.01	1.22	1.34	1.20	0.84	1.02	1.05	0.00	0.00	8%	0.00	0.00
SUS_067	1.00	1.01	0.89	0.74	0.76	0.66	0.68	0.82	0.88	0.88	0.97	0.98	0.86	0.00	0.87	0.80	0.91	0.83	0.82	0.94	0.84	0.89	0.95	0.95	0.96	0.92	0.90	0.95	1.03	1.20	1.22	1.12	1.21	0.99	0.83	0.97	1.07	0.80	1.02	1.20	1.27	1.03	0.96	0.89	0.00	0.00	3%	0.00	0.00
SUS_069	0.73	0.70	0.85	0.94	0.57	1.63	1.34	1.06	0.90	1.06	0.64	0.73	1.15	0.00	1.33	1.44	0.87	1.25	0.90	0.57	1.04	0.75	0.63	0.69	0.67	0.71	0.91	0.52	0.63	1.10	1.23	1.26	0.84	0.72	1.00	0.66	1.12	0.64	1.90	1.83	0.87	0.78	1.65	1.18	0.00	0.00	7%	54%	57%
SUS_073	0.61	0.60	0.54	0.99	0.99	0.94	0.86	0.80	0.88	0.88	0.93	0.93	0.89	0.00	0.80	0.73	0.84	0.75	0.86	1.03	0.85	0.77	0.81	0.81	0.82	0.67	0.67	0.71	0.64	0.79	0.78	0.72	0.98	0.88	0.75	0.86	1.02	1.05	1.07	1.28	1.25	0.93	1.01	0.99	0.00	0.00	4%	0.00	0.00
SUS_074	0.83	0.84	0.82	1.00	0.95	1.20	1.11	0.78	0.76	0.82	0.74	0.78	0.80	0.00	0.94	0.98	0.89	0.89	0.74	0.67	0.76	0.84	0.79	0.82	0.81	0.93	1.04	0.90	0.90	0.82	0.83	0.82	0.89	0.82	0.87	0.91	1.02	1.04	1.26	1.45	1.18	0.89	1.05	0.91	0.00	3%	5%	3%	0.00
SUS_009	0.69	0.70	0.68	0.96	1.03	0.91	0.95	0.74	0.75	0.81	0.71	0.70	0.75	0.00	0.84	0.79	0.81	0.80	0.57	0.67	0.63	0.64	0.65	0.64	0.63	0.69	0.71	0.71	0.58	0.74	0.70	0.71	0.95	0.84	0.75	0.72	1.00	0.92	1.30	1.40	1.23	0.83	1.10	1.04	0.00	0.00	7%	0.00	0.00
HT29 1 2810_1	0.73	0.61	0.68	0.79	0.78	0.71	0.70	0.77	0.78	0.82	0.81	0.86	0.79	1.00	0.74	0.85	0.80	0.80	0.77	0.97	0.91	1.04	1.05	1.08	1.11	0.73	0.74	0.82	0.63	0.75	0.73	0.76	1.12	0.98	0.81	0.91	1.16	0.90	0.47	1.41	1.55	0.99	1.19	1.10	99%	104%	99%	48%	88%
SUS_062 normal 1	0.98	1.02	1.01	1.00	0.98	0.99	1.01	1.04	1.02	1.08	0.95	0.99	1.05	0.00	1.05	1.02	1.02	1.07	1.01	1.00	1.05	0.98	1.01	1.01	1.02	0.98	0.95	0.96	0.94	1.03	1.00	1.01	0.95	0.98	1.03	0.98	0.99	1.05	1.07	1.04	0.97	1.01	1.01	0.98	3%	2%	5%	0.00	0.00
SUS_062 normal 2	0.96	0.87	0.98	0.98	0.98	1.01	1.02	1.02	1.01	0.94	0.99	1.08	0.99	0.00	0.95	1.00	0.93	0.97	0.99	0.92	0.98	1.00	0.98	1.03	0.99	0.97	0.99	0.99	0.93	0.93	0.97	1.03	1.00	1.01	0.99	1.00	0.99	0.90	0.98	0.98	1.03	1.04	0.96	1.02	0.00	3%	5%	0.00	0.00
SUS_062 normal 3	1.02	1.02	1.01	0.99	1.05	1.01	1.01	1.05	0.98	1.04	0.99	0.99	1.00	0.00	1.02	0.99	0.97	1.03	1.03	1.04	1.03	1.02	0.98	0.99	1.00	1.03	1.02	1.01	1.03	0.98	1.00	1.00	1.05	1.00	1.03	0.96	1.00	1.00	1.03	1.01	0.98	0.99	1.07	1.00	0.00	3%	4%	0.00	0.00
SUS_062 normal 4	1.02	1.09	1.00	1.02	0.96	1.03	1.03	0.96	1.00	0.99	1.03	0.96	0.99	0.00	1.03	1.02	1.05	0.96	1.03	0.98	1.00	1.03	1.02	1.00	0.99	1.02	1.07	1.02	1.11	1.06	1.04	1.00	0.97	0.97	1.00	1.04	0.99	1.03	1.01	1.03	1.00	0.96	1.02	1.00	2%	3%	6%	0.00	0.00
SUS_062 normal 5	1.03	1.03	1.00	1.02	1.03	0.96	0.93	0.94	0.99	0.96	1.05	0.98	0.97	0.00	0.96	0.97	1.04	0.98	0.96	1.08	0.95	0.98	1.01	0.98	1.01	1.00	0.98	1.03	1.02	1.01	1.00	0.97	1.04	1.03	0.95	1.03	1.04	1.04	0.93	0.95	1.02	1.01	0.95	0.99	2%	3%	5%	0.00	0.00
Caco2 2_2	0.57	0.53	0.53	0.87	1.00	0.61	0.65	0.70	0.92	0.82	1.02	1.04	0.76	0.00	0.35	0.34	0.41	0.36	0.71	1.12	0.80	0.61	0.72	0.70	0.75	0.69	0.60	0.83	0.59	1.49	1.56	1.45	0.00	0.52	0.73	0.99	1.30	1.02	0.75	1.30	0.39	1.81	0.91	1.25	26%	0.00	78%	0.00	0.00
SUS_103	0.70	0.69	0.56	1.03	1.22	0.65	0.70	0.50	0.72	0.64	0.86	0.87	0.55	0.00	0.45	0.39	0.60	0.45	0.42	0.86	0.47	0.62	0.78	0.72	0.81	0.64	0.56	0.90	0.63	0.69	0.64	0.62	0.00	0.98	0.64	0.95	1.13	1.17	0.84	1.23	1.53	1.00	0.80	0.97	61%	70%	77%	66%	93%
SUS_111	0.55	0.54	0.49	1.05	1.11	0.78	0.83	0.44	0.57	0.51	0.55	0.55	0.47	0.00	0.77	0.68	0.81	0.70	0.51	0.67	0.54	0.71	0.81	0.77	0.81	0.71	0.63	0.75	0.75	0.73	0.77	0.69	0.00	0.92	0.67	0.79	1.07	1.19	1.09	1.43	1.27	0.90	0.95	1.02	0.00	0.00	5%	0.00	0.00
SUS_125	0.77	0.82	0.67	1.09	1.06	0.69	0.70	0.55	0.70	0.67	0.76	0.73	0.57	0.00	0.80	0.62	0.92	0.69	0.43	0.65	0.44	0.51	0.66	0.61	0.66	0.66	0.55	0.81	0.60	0.59	0.60	0.51	0.00	0.96	0.57	0.78	1.02	1.18	0.90	1.38	1.36	0.91	0.91	1.03	0.00	4%	5%	0.00	0.00
SUS_130	0.81	0.84	0.70	1.05	1.16	0.71	0.78	0.57	0.81	0.68	0.93	0.86	0.64	0.00	0.79	0.67	0.92	0.70	0.50	0.80	0.50	0.54	0.66	0.64	0.69	0.72	0.59	0.88	0.69	0.73	0.73	0.66	0.00	1.02	0.63	0.88	1.33	1.19	0.87	1.25	1.33	0.97	0.82	0.96	0.00	0.00	6%	0.00	0.00
SUS_142	0.67	0.73	0.82	0.97	1.04	1.24	1.27	1.01	0.79	0.94	0.79	0.73	0.92	0.00	0.95	1.02	0.78	0.91	0.79	0.62	0.88	0.97	0.73	0.80	0.77	0.86	0.94	0.74	0.59	0.74	0.80	0.93	0.00	0.56	0.94	0.70	0.95	1.04	1.58	1.07	1.18	0.90	1.43	1.00	0.00	0.00	0.00	31%	0.00
SUS_154	0.80	0.76	0.78	0.98	1.16	0.87	0.90	0.63	0.68	0.77	0.74	0.79	0.73	0.00	0.80	0.74	0.89	0.74	0.87	0.36	0.91	0.76	0.81	0.79	0.84	0.85	0.71	0.35	0.72	0.75	0.82	0.77	0.00	1.00	0.70	0.97	1.07	1.14	1.05	1.40	1.26	0.83	0.94	0.77	0.00	0.00	7%	0.00	0.00
SUS_158	0.69	0.73	0.65	1.07	1.08	0.81	0.83	0.57	0.75	0.67	0.72	0.72	0.61	1.00	0.97	0.80	0.99	0.82	0.65	0.88	0.68	0.80	0.84	0.84	0.88	1.13	1.02	1.21	1.17	0.68	0.66	0.67	0.00	0.98	0.66	1.07	1.04	1.10	0.88	1.69	1.34	0.89	0.75	0.83	0.00	0.00	5%	0.00	0.00
SUS_169	0.71	0.80	0.67	0.65	0.67	0.47	0.49	0.39	0.49	0.47	0.53	0.51	0.44	0.00	0.45	0.41	0.52	0.41	0.38	0.48	0.37	0.80	0.89	0.89	0.93	0.50	0.42	0.52	0.48	0.74	0.77	0.68	0.00	1.11	0.74	1.02	1.12	0.71	0.61	1.41	0.77	1.00	0.93	1.18	0.00	0.00	0.00	0.00	0.00
SUS_175	0.74	0.80	0.66	1.03	1.17	0.74	0.76	0.60	0.77	0.71	0.86	0.81	0.64	0.00	0.75	0.64	0.83	0.67	0.56	0.83	0.57	0.66	0.76	0.71	0.80	0.68	0.60	0.81	0.59	0.71	0.69	0.63	0.00	0.98	0.62	0.84	1.01	1.15	1.00	1.36	1.32	0.92	0.83	1.14	0.00	8%	19%	0.00	0.00
SUS_189	0.60	0.60	0.69	0.86	0.83	0.86	0.90	0.89	0.92	1.05	0.85	0.85	0.99	0.00	0.79	0.75	0.67	0.72	0.56	0.56	0.60	0.81	0.63	0.71	0.66	1.03	0.91	0.80	0.86	0.68	0.78	0.77	0.00	0.77	0.88	0.86	1.01	0.87	1.14	1.94	1.01	0.97	1.31	1.18	0.00	0.00	0.00	0.00	0.00
SUS_190	0.71	0.68	0.69	1.03	0.93	0.86	0.82	0.65	0.81	0.75	0.75	0.74	0.65	0.00	0.73	0.71	0.75	0.71	0.55	0.61	0.56	0.66	0.77	0.78	0.79	0.69	0.63	0.74	0.60	0.72	0.75	0.68	0.00	0.89	0.67	0.79	1.06	0.98	1.14	1.47	1.17	0.89	0.98	1.03	54%	63%	62%	0.00	0.00
SUS_209	0.57	0.62	0.74	0.92	0.89	1.00	0.99	0.78	0.81	0.89	0.68	0.64	0.82	1.00	0.78	0.83	0.67	0.81	0.56	0.60	0.65	0.76	0.71	0.75	0.69	0.78	0.65	0.68	0.59	0.70	0.71	0.76	0.00	0.76	0.82	0.68	0.96	0.99	1.34	1.73	1.28	0.80	1.19	1.00	46%	50%	35%	22%	0.00
SUS_223	0.60	0.60	0.65	0.90	0.96	0.93	0.95	0.61	0.63	0.69	0.54	0.59	0.64	0.00	0.85	0.84	0.76	0.82	0.53	0.65	0.64	0.80	0.70	0.76	0.72	0.65	0.60	0.65	0.49	0.63	0.63	0.72	0.00	0.81	0.76	0.75	1.06	0.98	1.21	1.51	1.29	0.75	1.15	0.99	0.00	0.00	0.00	0.00	0.00
SUS_256	0.64	0.69	0.63	1.06	1.08	0.93	0.94	0.66	0.78	0.86	0.71	0.75	0.77	0.00	0.79	0.68	0.71	0.71	0.53	0.66	0.60	0.49	0.45	0.48	0.49	0.93	0.88	0.92	0.91	0.75	0.74	0.73	0.00	0.85	0.74	0.75	1.04	1.20	1.14	1.75	1.14	0.87	1.11	0.99	0.00	0.00	0.00	46%	71%
SUS_282	0.71	0.73	0.64	1.11	1.11	0.83	0.86	0.60	0.74	0.70	0.81	0.74	0.62	0.00	0.74	0.68	0.79	0.68	0.52	0.65	0.51	0.65	0.73	0.71	0.76	0.70	0.63	0.79	0.67	0.65	0.69	0.60	0.00	0.94	0.63	0.83	1.01	1.12	1.10	1.39	1.30	0.90	0.96	1.05	8%	0.00	0.00	0.00	0.00
SUS_076	0.72	0.81	0.76	1.04	1.04	0.71	0.84	0.65	0.80	0.72	0.81	0.83	0.66	1.00	0.75	0.68	0.83	0.67	0.52	0.70	0.59	0.70	0.86	0.82	0.88	0.75	0.66	0.91	0.84	0.77	0.78	0.70	0.00	0.97	0.67	0.88	1.09	1.12	1.01	1.37	1.31	1.00	0.95	0.99	64%	65%	66%	64%	113%
SUS_077	0.78	0.67	0.82	0.98	0.92	0.95	0.99	0.62	0.86	0.81	0.78	0.85	0.73	0.00	0.90	0.76	0.87	0.82	0.61	0.69	0.68	0.80	0.76	0.85	0.80	0.95	0.86	0.85	0.75	0.76	0.78	0.84	0.00	0.83	0.75	0.91	1.12	0.88	1.07	1.61	1.10	1.18	0.87	1.03	0.00	0.00	7%	0.00	0.00
SUS_078	0.75	0.81	0.72	1.07	1.10	0.64	0.73	0.56	0.78	0.66	0.91	0.77	0.60	0.00	0.70	0.59	0.80	0.61	0.51	0.71	0.49	0.62	0.81	0.76	0.83	0.72	0.60	0.84	0.67	0.72	0.70	0.61	0.00	0.97	0.60	0.90	1.01	1.13	0.91	1.27	1.29	0.97	0.80	1.01	0.00	0.00	0.00	0.00	0.00
SUS_081	0.81	0.82	0.85	1.05	0.83	0.98	0.94	0.83	0.89	0.89	0.82	0.84	0.84	0.00	0.90	0.89	0.80	0.84	0.69	0.66	0.73	0.80	0.90	0.87	0.97	0.80	0.86	0.82	0.80	0.81	0.89	0.81	0.00	0.90	0.84	0.77	1.09	0.91	1.18	1.87	1.03	0.92	1.06	1.06	0.00	0.00	4%	0.00	0.00
SUS_082	0.88	0.94	0.67	1.18	1.24	0.62	0.66	0.39	0.55	0.48	0.68	0.68	0.43	0.00	1.21	1.00	1.64	1.11	0.46	0.90	0.48	0.45	0.68	0.58	0.66	0.66	0.57	1.07	0.59	0.54	0.54	0.46	0.00	1.11	0.42	1.03	1.44	1.35	0.75	1.10	1.57	0.82	0.53	0.68	0.00	0.00	0.00	0.00	0.00
SUS_085	0.89	0.89	0.66	1.07	1.08	0.69	0.68	0.53	0.78	0.75	0.74	0.77	0.60	0.00	0.74	0.61	0.87	0.66	0.51	0.94	0.54	0.63	0.84	0.77	0.85	0.67	0.55	0.89	0.65	0.82	0.74	0.66	0.00	0.97	0.68	0.92	1.06	1.25	0.79	1.18	1.37	0.91	0.80	0.99	0.00	0.00	0.00	0.00	0.00
SUS_086	0.67	0.64	0.61	1.05	1.01	0.76	0.81	0.67	0.81	0.78	0.83	0.83	0.73	1.00	0.77	0.71	0.79	0.71	0.44	0.59	0.50	0.65	0.73	0.71	0.74	0.58	0.56	0.75	0.50	0.64	0.60	0.61	0.00	0.97	0.74	0.86	1.06	1.14	0.98	1.44	1.26	0.95	0.91	0.99	42%	47%	49%	38%	48%
SUS_087	0.79	0.57	0.65	0.85	1.12	1.03	0.99	0.78	0.89	0.83	0.64	0.73	0.72	1.00	0.84	0.86	0.73	0.87	0.62	1.03	0.93	0.87	0.92	0.88	0.91	0.57	0.66	0.88	0.49	0.78	0.59	0.89	0.00	1.04	0.86	0.83	1.06	1.11	0.92	0.81	1.21	0.76	1.18	1.00	30%	43%	36%	43%	96%
SUS_088	0.62	0.68	0.80	0.75	0.75	0.82	0.89	0.65	0.61	0.75	0.55	0.52	0.70	0.00	1.24	1.16	0.94	1.14	0.50	0.45	0.52	0.72	0.58	0.66	0.60	1.09	1.05	0.83	0.86	0.77	0.86	0.91	0.00	0.86	0.88	0.72	0.96	0.77	1.06	1.85	1.34	1.01	1.30	1.06	31%	57%	55%	0.00	0.00
SUS_089	0.65	0.68	0.75	1.00	1.00	0.94	0.96	0.77	0.78	0.83	0.76	0.75	0.77	0.00	0.88	0.79	0.79	0.83	0.61	0.65	0.65	0.78	0.74	0.76	0.78	0.76	0.69	0.73	0.60	0.74	0.76	0.79	0.00	0.87	0.80	0.76	1.00	1.03	1.24	1.63	1.18	0.83	1.13	1.04	21%	18%	17%	11%	24%
SUS_094	0.71	0.74	0.68	1.05	1.07	0.79	0.85	0.58	0.77	0.70	0.79	0.77	0.63	1.00	0.73	0.67	0.80	0.71	0.50	0.73	0.51	0.65	0.75	0.71	0.78	0.63	0.56	0.70	0.64	0.71	0.67	0.65	0.00	0.93	0.66	0.84	1.07	1.12	1.00	1.37	1.22	0.91	0.87	1.10	39%	44%	39%	0.00	0.00
SUS_096	0.80	0.85	0.71	1.01	1.14	0.66	0.71	0.54	0.81	0.65	0.88	0.89	0.59	0.00	0.70	0.58	0.86	0.64	0.50	0.85	0.50	0.64	0.86	0.83	0.89	0.71	0.57	0.96	0.70	0.75	0.71	0.63	0.00	1.04	0.59	0.96	1.06	1.21	0.77	1.19	1.35	1.01	0.77	0.95	0.00	0.00	0.00	63%	89%
HT29 1 2810_2	0.71	0.62	0.60	0.76	0.86	0.48	0.49	0.53	0.76	0.66	0.84	0.88	0.57	1.00	0.62	0.59	0.81	0.62	0.55	1.02	0.62	0.81	1.02	0.96	1.11	0.64	0.51	0.91	0.58	0.68	0.69	0.61	0.00	1.02	0.62	1.00	1.14	0.89	0.32	1.18	1.52	1.03	0.86	1.01	95%	98%	105%	48%	81%
SUS_062 normal 10	0.99	1.01	1.04	1.01	0.97	1.17	1.03	1.12	1.00	1.03	0.93	0.94	1.01	0.00	0.99	1.06	1.02	1.04	1.07	1.00	1.14	1.00	1.04	1.08	1.03	0.96	1.09	0.97	0.91	1.06	1.02	1.05	0.00	0.95	1.07	0.98	1.01	0.93	1.07	1.00	0.98	1.02	1.13	0.98	0.00	3%	4%	0.00	0.00
SUS_062 normal 11	1.03	1.14	0.93	1.05	1.14	0.72	0.76	0.74	0.97	0.85	1.12	1.06	0.75	0.00	0.86	0.75	1.05	0.79	0.78	1.02	0.73	0.80	0.99	0.90	0.99	0.99	0.80	1.10	1.07	0.95	0.99	0.82	0.00	1.12	0.79	1.12	0.99	1.15	0.77	0.92	1.13	1.04	0.74	0.97	0.00	2%	6%	0.00	0.00
SUS_062 normal 12	0.97	0.94	1.16	0.93	0.96	1.14	1.11	1.12	1.09	1.14	1.00	1.00	1.20	0.00	1.23	1.11	0.95	1.09	1.10	0.98	1.12	1.18	0.98	1.05	1.01	1.18	1.05	0.95	1.13	1.09	1.17	1.18	0.00	0.99	1.09	0.95	0.99	1.03	1.08	1.21	0.98	0.94	1.11	1.05	0.00	0.00	4%	0.00	0.00
SUS_062 normal 8	1.00	0.93	0.91	1.02	0.95	1.15	1.23	1.17	0.95	1.03	0.97	1.02	1.18	0.00	0.98	1.22	0.98	1.18	1.14	1.00	1.17	1.10	0.99	0.98	0.97	0.91	1.14	0.99	0.93	0.92	0.87	1.01	0.00	0.96	1.14	0.96	1.01	0.92	1.18	0.92	0.93	1.01	1.14	1.00	0.00	3%	5%	0.00	0.00
SUS_033_re	0.83	0.85	0.97	0.87	0.78	1.00	1.02	0.81	0.69	0.71	0.70	0.69	0.74	0.00	0.92	1.01	0.88	1.02	1.25	0.87	1.32	0.72	0.65	0.68	0.71	0.86	1.02	0.78	0.90	1.28	1.45	1.40	1.15	0.72	1.05	1.00	1.07	0.79	1.17	1.42	1.00	0.78	1.04	0.93	0.00	3%	4%	0.00	0.00
SUS_104_re	0.72	0.69	0.70	0.97	0.92	0.89	0.88	0.76	0.80	0.76	0.76	0.77	0.76	0.00	0.73	0.72	0.75	0.72	0.64	0.66	0.67	0.62	0.62	0.61	0.63	0.69	0.75	0.74	0.63	0.70	0.72	0.71	0.99	0.84	0.76	0.75	1.01	0.93	1.17	1.37	1.05	0.85	1.09	1.00	0.00	0.00	4%	0.00	0.00
SUS_162_re	0.65	0.70	0.67	1.02	1.00	0.96	1.00	0.71	0.73	0.76	0.75	0.78	0.75	1.00	0.83	0.78	0.84	0.79	0.58	0.67	0.61	0.86	0.87	0.87	0.86	0.72	0.74	0.76	0.78	0.69	0.70	0.73	1.04	0.84	0.75	0.78	0.98	0.98	1.23	1.50	1.15	0.86	1.06	1.05	34%	40%	39%	30%	32%
SUS_231_re	0.69	0.70	0.70	1.01	1.03	0.92	0.94	0.68	0.71	0.70	0.76	0.72	0.68	0.00	0.78	0.77	0.80	0.79	0.60	0.66	0.63	0.71	0.71	0.72	0.73	0.71	0.75	0.73	0.68	0.67	0.69	0.67	1.03	0.85	0.71	0.75	0.97	1.03	1.24	1.45	1.16	0.84	1.03	1.06	0.00	0.00	5%	0.00	0.00
SUS_258_re	0.68	0.66	0.67	1.00	1.02	0.90	0.96	0.70	0.72	0.72	0.77	0.75	0.72	1.00	0.87	0.89	0.98	0.88	0.57	0.67	0.60	0.73	0.73	0.72	0.71	0.71	0.74	0.73	0.72	0.67	0.66	0.69	1.03	0.86	0.68	0.78	0.97	1.03	1.18	1.40	1.40	0.84	1.05	1.03	46%	50%	49%	45%	83%
SUS_062 normal 13	1.02	1.03	1.01	1.04	1.03	1.05	0.99	1.01	1.00	1.02	1.00	1.00	0.99	0.00	1.01	1.02	1.05	1.02	0.98	1.06	0.98	0.99	1.04	1.02	1.02	0.98	0.96	1.01	1.00	1.02	0.97	1.01	1.05	1.02	1.02	1.00	1.00	1.06	0.99	1.00	1.03	0.99	0.98	0.98	0.00	0.00	4%	0.00	0.00
SUS_062 normal 14	1.02	1.00	1.01	1.00	1.01	0.97	1.03	1.03	1.02	1.01	1.04	1.01	1.01	0.00	1.02	1.02	1.01	1.00	1.04	0.98	1.03	1.04	0.99	1.00	1.01	1.03	1.06	1.03	1.08	0.99	1.02	0.99	1.01	1.01	0.99	1.01	1.00	0.97	1.00	1.00	1.03	1.01	1.01	1.00	0.00	0.00	4%	0.00	0.00
SUS_062 normal 15	0.97	0.97	0.97	0.96	0.96	0.98	0.98	0.97	0.98	0.98	0.96	0.99	1.00	0.00	0.97	0.96	0.94	0.98	0.98	0.97	0.99	0.98	0.97	0.98	0.97	0.99	0.98	0.96	0.94	1.00	1.01	1.01	0.95	0.97	0.98	0.98	1.00	0.98	1.00	1.01	0.94	1.00	1.02	1.02	0.00	2%	5%	0.00	0.00
[truncated: 39 more columns]

## Sheet: Scoring_chr_meth
Patient sample ID	01-025128720 - RUNX3-2	01-025128920 - RUNX3-2	01-025129597 - RUNX3-2	03-037009360 - MLH1-1	03-037009621 - MLH1-1	03-037009760 - MLH1-1	03-037010228 - MLH1-1	05-134898938 - NEUROG1-1	05-134899244 - NEUROG1-1	05-134899351 - NEUROG1-1	05-134899479 - NEUROG1-1	05-134899537 - NEUROG1-1	05-134899663 - NEUROG1-1	09-021964677 - CDKN2A-2a	09-021965200 - CDKN2A-2a	09-021984268 - CDKN2A-1	09-021985276 - CDKN2A-up	11-002117594 - IGF2-4	11-002118681 - IGF2-3	11-002118895 - IGF2-3	15-076419820 - CRABP1-1	15-076420033 - CRABP1-1	15-076420493 - CRABP1-2	15-076420701 - CRABP1-2	16-011256544 - SOCS1-2	16-011256960 - SOCS1-2	16-011257200 - SOCS1-1	16-011257552 - SOCS1-1	17-045993509 - CACNA1G-1	17-045993744 - CACNA1G-1	17-045993972 - CACNA1G-1	17-057295679 - BRIP1-1	DIG_01-025128720 - RUNX3-2	DIG_01-025128920 - RUNX3-2	DIG_01-025129597 - RUNX3-2	DIG_03-037009360 - MLH1-1	DIG_03-037009621 - MLH1-1	DIG_03-037009760 - MLH1-1	DIG_03-037010228 - MLH1-1	DIG_05-134898938 - NEUROG1-1	DIG_05-134899244 - NEUROG1-1	DIG_05-134899351 - NEUROG1-1	DIG_05-134899479 - NEUROG1-1	DIG_05-134899537 - NEUROG1-1	DIG_05-134899663 - NEUROG1-1	DIG_07-140099560 - BRAF(MUT)	DIG_09-021964677 - CDKN2A-2a	DIG_09-021965200 - CDKN2A-2a	DIG_09-021984268 - CDKN2A-1
	- RUNX3-2	- RUNX3-2	- RUNX3-2	- MLH1-1	- MLH1-1	- MLH1-1	- MLH1-1	NEUROG1-1	NEUROG1-1	NEUROG1-1	NEUROG1-1	NEUROG1-1	NEUROG1-1	CDKN2A-2a	CDKN2A-2a	CDKN2A-1	CDKN2A-up	- IGF2-4	- IGF2-3	- IGF2-3	CRABP1-1	CRABP1-1	CRABP1-2	CRABP1-2	- SOCS1-2	- SOCS1-2	- SOCS1-1	- SOCS1-1	CACNA1G-1	CACNA1G-1	CACNA1G-1	- BRIP1-1	M - RUNX3-2	M - RUNX3-2	M - RUNX3-2	M - MLH1-1	M - MLH1-1	M - MLH1-1	M - MLH1-1	M NEUROG1-1	M NEUROG1-1	M NEUROG1-1	M NEUROG1-1	M NEUROG1-1	M NEUROG1-1	M BRAF(MUT)	M CDKN2A-2a	M CDKN2A-2a	M- CDKN2A-1
																																	20.%
Caco2	LOSS	LOSS	LOSS	normal	normal	LOSS	LOSS	normal	normal	normal	normal	normal	normal	LOSS	LOSS	LOSS	LOSS	normal	normal	normal	LOSS	normal	normal	normal	LOSS	LOSS	normal	LOSS	GAIN	GAIN	GAIN	LOSS	MET	normal	MET	normal	normal	normal	normal	MET	MET	MET	normal	MET	MET	normal	MET	MET	normal
HT29	normal	LOSS	LOSS	normal	normal	normal	normal	normal	normal	normal	normal	normal	normal	normal	normal	normal	normal	normal	normal	normal	normal	normal	normal	normal	normal	normal	normal	LOSS	normal	normal	normal	normal	MET	normal	MET	MET	MET	normal	normal	MET	MET	MET	MET	MET	MET	MET	normal	MET	normal
SUS_006	LOSS	LOSS	LOSS	normal	normal	normal	normal	normal	normal	normal	normal	normal	normal	normal	normal	normal	normal	LOSS	LOSS	LOSS	normal	normal	normal	normal	normal	normal	LOSS	normal	LOSS	LOSS	LOSS	normal	normal	normal	normal	normal	normal	normal	MET	normal	normal	normal	MET	normal	MET	normal	normal	normal	normal
SUS_007	LOSS	LOSS	normal	normal	normal	normal	normal	normal	normal	normal	normal	normal	normal	normal	normal	normal	normal	LOSS	LOSS	LOSS	normal	normal	normal	normal	normal	normal	normal	LOSS	normal	normal	normal	normal	MET	MET	MET	MET	MET	MET	MET	MET	MET	MET	MET	MET	MET	normal	MET	MET	normal
SUS_009	LOSS	normal	LOSS	normal	normal	normal	normal	normal	normal	normal	normal	normal	normal	normal	normal	normal	normal	LOSS	LOSS	LOSS	LOSS	LOSS	LOSS	LOSS	LOSS	normal	normal	LOSS	normal	normal	normal	normal	normal	normal	MET	normal	normal	normal	MET	MET	normal	MET	MET	MET	MET	normal	normal	normal	normal
SUS_010	LOSS	LOSS	normal	normal	normal	normal	normal	normal	normal	normal	normal	normal	normal	normal	normal	normal	normal	LOSS	LOSS	normal	normal	normal	normal	normal	normal	normal	normal	normal	LOSS	LOSS	normal	normal	MET	MET	MET	normal	normal	normal	normal	MET	MET	MET	MET	MET	MET	MET	MET	normal	MET
SUS_011	LOSS	LOSS	LOSS	normal	normal	normal	normal	normal	normal	normal	LOSS	LOSS	normal	normal	normal	normal	normal	LOSS	LOSS	LOSS	normal	normal	normal	normal	LOSS	normal	LOSS	LOSS	LOSS	LOSS	normal	normal	MET	MET	MET	MET	MET	MET	MET	MET	MET	MET	MET	MET	MET	MET	MET	MET	MET
SUS_012	normal	normal	normal	normal	normal	normal	normal	normal	normal	normal	normal	normal	normal	normal	normal	normal	normal	normal	normal	normal	normal	normal	normal	normal	normal	normal	normal	normal	normal	normal	normal	normal	normal	normal	normal	normal	normal	MET	MET	MET	MET	MET	MET	MET	MET	normal	normal	normal	MET
SUS_013	LOSS	LOSS	LOSS	normal	normal	normal	normal	normal	normal	normal	normal	normal	normal	normal	normal	normal	normal	LOSS	LOSS	normal	normal	normal	normal	normal	normal	normal	normal	normal	normal	LOSS	normal	normal	MET	MET	MET	MET	MET	MET	MET	MET	MET	MET	MET	MET	MET	MET	MET	MET	MET
SUS_019	normal	normal	normal	normal	normal	normal	normal	normal	normal	normal	normal	normal	normal	normal	normal	normal	normal	normal	GAIN	normal	normal	normal	normal	normal	normal	normal	GAIN	normal	GAIN	normal	normal	normal	normal	normal	normal	normal	normal	normal	normal	normal	normal	normal	MET	MET	normal	normal	normal	normal	normal
SUS_022	normal	normal	normal	normal	normal	normal	normal	normal	normal	normal	normal	normal	normal	normal	normal	normal	normal	normal	normal	normal	normal	normal	normal	normal	normal	normal	normal	normal	normal	normal	normal	normal	normal	normal	normal	normal	normal	MET	MET	MET	MET	MET	MET	MET	normal	normal	MET	MET	MET
SUS_024	LOSS	LOSS	LOSS	normal	normal	normal	normal	normal	LOSS	LOSS	LOSS	LOSS	LOSS	normal	normal	normal	normal	normal	normal	normal	LOSS	LOSS	LOSS	LOSS	GAIN	GAIN	GAIN	GAIN	normal	normal	normal	normal	normal	normal	normal	normal	normal	MET	MET	MET	MET	MET	MET	normal	normal	normal	normal	normal	MET
SUS_028	LOSS	LOSS	LOSS	normal	normal	normal	normal	normal	normal	normal	normal	normal	normal	normal	normal	normal	normal	LOSS	LOSS	normal	LOSS	LOSS	LOSS	LOSS	normal	normal	normal	LOSS	LOSS	normal	normal	normal	normal	normal	MET	normal	normal	normal	MET	MET	MET	MET	MET	normal	normal	normal	normal	normal	normal
SUS_029	normal	normal	normal	normal	normal	normal	normal	normal	normal	normal	normal	normal	normal	normal	normal	normal	normal	normal	normal	normal	normal	normal	normal	normal	normal	normal	normal	LOSS	normal	normal	normal	normal	normal	normal	MET	normal	normal	normal	MET	MET	MET	normal	MET	MET	MET	normal	MET	MET	normal
SUS_031	normal	normal	normal	normal	normal	normal	normal	normal	normal	normal	normal	normal	normal	normal	normal	normal	normal	normal	normal	normal	normal	normal	normal	normal	normal	normal	normal	normal	normal	normal	normal	normal	MET	MET	MET	MET	MET	MET	MET	MET	MET	MET	MET	MET	MET	normal	MET	MET	MET
SUS_033_re	normal	normal	normal	normal	normal	normal	normal	normal	LOSS	normal	normal	LOSS	normal	normal	normal	normal	normal	normal	normal	GAIN	normal	LOSS	LOSS	normal	normal	normal	normal	normal	normal	GAIN	GAIN	normal	normal	MET	MET	normal	normal	normal	MET	normal	MET	MET	MET	MET	normal	normal	normal	normal	MET
SUS_035	normal	normal	normal	normal	normal	normal	normal	normal	normal	normal	normal	normal	normal	normal	normal	normal	normal	normal	normal	normal	normal	normal	normal	normal	normal	normal	normal	normal	normal	normal	normal	normal	MET	MET	MET	MET	MET	MET	MET	MET	MET	MET	MET	MET	MET	MET	MET	MET	MET
SUS_036	normal	normal	normal	normal	normal	GAIN	normal	normal	normal	normal	LOSS	LOSS	normal	normal	normal	normal	normal	normal	normal	normal	normal	normal	normal	normal	normal	GAIN	normal	normal	normal	normal	normal	LOSS	normal	normal	MET	normal	normal	MET	MET	MET	normal	MET	MET	MET	normal	normal	normal	normal	normal
SUS_040	LOSS	LOSS	LOSS	normal	normal	normal	normal	normal	normal	normal	normal	normal	normal	normal	normal	normal	normal	normal	normal	normal	normal	normal	normal	normal	normal	normal	normal	normal	normal	normal	normal	normal	MET	MET	MET	MET	MET	MET	MET	MET	MET	MET	MET	MET	MET	MET	MET	normal	normal
SUS_041	normal	normal	normal	normal	normal	normal	normal	normal	normal	normal	normal	normal	normal	normal	normal	normal	normal	normal	normal	normal	LOSS	LOSS	LOSS	LOSS	normal	normal	normal	normal	normal	normal	normal	normal	MET	MET	MET	normal	normal	normal	MET	MET	MET	MET	MET	MET	MET	normal	normal	normal	MET
SUS_043	LOSS	LOSS	LOSS	normal	normal	GAIN	normal	normal	normal	normal	normal	normal	normal	normal	normal	normal	normal	normal	normal	normal	normal	normal	normal	normal	normal	normal	normal	normal	normal	normal	normal	normal	normal	normal	normal	normal	normal	MET	MET	MET	MET	MET	MET	MET	normal	normal	normal	normal	normal
SUS_044	normal	normal	normal	normal	normal	normal	normal	normal	normal	normal	normal	normal	normal	normal	normal	normal	normal	normal	normal	normal	normal	normal	normal	normal	normal	normal	normal	normal	normal	normal	normal	normal	MET	MET	MET	MET	MET	MET	MET	MET	MET	MET	MET	MET	MET	MET	MET	MET	MET
SUS_045	normal	normal	normal	normal	normal	normal	normal	normal	normal	normal	normal	normal	normal	normal	normal	normal	normal	normal	normal	normal	normal	normal	normal	normal	normal	normal	normal	LOSS	normal	normal	normal	normal	MET	MET	MET	MET	MET	MET	MET	MET	MET	MET	MET	MET	MET	MET	MET	MET	MET
SUS_051	normal	normal	normal	normal	normal	normal	normal	normal	normal	LOSS	normal	normal	LOSS	normal	normal	normal	normal	normal	normal	normal	normal	normal	normal	normal	normal	normal	normal	normal	normal	normal	normal	normal	normal	normal	normal	normal	normal	normal	normal	MET	normal	normal	normal	normal	normal	normal	normal	normal	normal
SUS_053	normal	normal	normal	normal	normal	normal	normal	normal	normal	normal	normal	normal	normal	normal	normal	normal	normal	LOSS	normal	normal	normal	normal	normal	normal	normal	normal	normal	normal	normal	normal	normal	normal	MET	MET	MET	MET	normal	MET	MET	MET	MET	MET	MET	MET	MET	normal	MET	MET	normal
SUS_056	LOSS	normal	LOSS	normal	normal	normal	normal	LOSS	LOSS	LOSS	LOSS	LOSS	LOSS	normal	normal	normal	normal	LOSS	LOSS	LOSS	normal	normal	normal	normal	LOSS	LOSS	LOSS	LOSS	LOSS	LOSS	LOSS	normal	MET	MET	MET	MET	normal	normal	MET	MET	MET	MET	MET	MET	MET	normal	MET	MET	normal
SUS_057	normal	normal	normal	normal	normal	normal	normal	normal	normal	normal	normal	normal	normal	normal	normal	normal	normal	normal	normal	normal	normal	normal	normal	normal	normal	GAIN	GAIN	GAIN	normal	normal	normal	normal	normal	MET	MET	normal	normal	normal	MET	MET	MET	MET	MET	MET	normal	normal	normal	normal	normal
SUS_059	normal	normal	normal	normal	LOSS	normal	normal	normal	normal	normal	normal	normal	normal	normal	normal	normal	normal	LOSS	LOSS	normal	normal	normal	normal	normal	normal	normal	normal	normal	normal	normal	normal	normal	normal	MET	MET	MET	normal	normal	MET	MET	MET	MET	MET	MET	MET	normal	normal	normal	MET
SUS_060	LOSS	LOSS	LOSS	normal	normal	normal	normal	normal	normal	normal	normal	normal	normal	normal	normal	normal	normal	LOSS	LOSS	LOSS	LOSS	LOSS	LOSS	LOSS	normal	normal	normal	LOSS	normal	normal	normal	normal	normal	normal	MET	normal	normal	normal	MET	MET	MET	MET	MET	normal	normal	normal	normal	MET	MET
SUS_061	normal	normal	normal	normal	normal	normal	normal	normal	normal	normal	normal	normal	normal	LOSS	LOSS	normal	normal	normal	normal	normal	LOSS	normal	LOSS	LOSS	LOSS	LOSS	normal	LOSS	normal	normal	normal	normal	MET	MET	MET	normal	normal	normal	normal	MET	MET	MET	MET	MET	normal	normal	normal	normal	MET
SUS_064	LOSS	LOSS	LOSS	normal	normal	normal	normal	LOSS	normal	normal	normal	normal	LOSS	normal	normal	normal	normal	LOSS	LOSS	LOSS	LOSS	normal	normal	normal	LOSS	LOSS	normal	LOSS	LOSS	LOSS	LOSS	normal	normal	normal	MET	normal	normal	MET	MET	MET	MET	MET	MET	MET	MET	normal	MET	normal	normal
SUS_067	normal	normal	normal	normal	normal	LOSS	LOSS	normal	normal	normal	normal	normal	normal	normal	normal	normal	normal	normal	normal	normal	normal	normal	normal	normal	normal	normal	normal	normal	normal	normal	normal	normal	normal	normal	MET	normal	normal	normal	normal	MET	MET	MET	MET	MET	MET	normal	normal	normal	MET
SUS_069	normal	normal	normal	normal	LOSS	GAIN	GAIN	normal	normal	normal	LOSS	normal	normal	GAIN	GAIN	normal	normal	normal	LOSS	normal	normal	LOSS	LOSS	LOSS	normal	normal	LOSS	LOSS	normal	normal	normal	normal	normal	normal	MET	MET	MET	normal	MET	MET	MET	MET	normal	MET	normal	normal	normal	normal	normal
SUS_073	LOSS	LOSS	LOSS	normal	normal	normal	normal	normal	normal	normal	normal	normal	normal	normal	normal	normal	normal	normal	normal	normal	normal	normal	normal	normal	LOSS	LOSS	normal	LOSS	normal	normal	normal	normal	normal	normal	MET	normal	normal	normal	MET	MET	MET	MET	MET	MET	MET	normal	normal	normal	MET
SUS_074	normal	normal	normal	normal	normal	normal	normal	normal	normal	normal	normal	normal	normal	normal	normal	normal	normal	normal	LOSS	normal	normal	normal	normal	normal	normal	normal	normal	normal	normal	normal	normal	normal	normal	MET	MET	MET	normal	normal	MET	MET	MET	MET	MET	MET	normal	normal	MET	MET	normal
SUS_076	normal	normal	normal	normal	normal	normal	normal	LOSS	normal	normal	normal	normal	LOSS	normal	LOSS	normal	LOSS	LOSS	normal	LOSS	normal	normal	normal	normal	normal	LOSS	normal	normal	normal	normal	normal	LOSS	MET	MET	MET	MET	normal	MET	MET	MET	MET	MET	MET	MET	MET	normal	MET	MET	MET
SUS_077	normal	LOSS	normal	normal	normal	normal	normal	LOSS	normal	normal	normal	normal	normal	normal	normal	normal	normal	LOSS	LOSS	LOSS	normal	normal	normal	normal	normal	normal	normal	normal	normal	normal	normal	LOSS	normal	normal	MET	normal	normal	normal	normal	MET	MET	MET	MET	normal	normal	normal	MET	normal	MET
SUS_078	normal	normal	normal	normal	normal	LOSS	normal	LOSS	normal	LOSS	normal	normal	LOSS	normal	LOSS	normal	LOSS	LOSS	normal	LOSS	LOSS	normal	normal	normal	normal	LOSS	normal	LOSS	normal	normal	LOSS	LOSS	normal	normal	normal	normal	normal	normal	normal	MET	MET	MET	MET	MET	normal	normal	MET	normal	normal
SUS_081	normal	normal	normal	normal	normal	normal	normal	normal	normal	normal	normal	normal	normal	normal	normal	normal	normal	LOSS	LOSS	normal	normal	normal	normal	normal	normal	normal	normal	normal	normal	normal	normal	LOSS	normal	normal	MET	normal	normal	normal	normal	MET	MET	MET	normal	MET	normal	normal	normal	normal	MET
SUS_082	normal	normal	LOSS	normal	normal	LOSS	LOSS	LOSS	LOSS	LOSS	LOSS	LOSS	LOSS	normal	normal	GAIN	normal	LOSS	normal	LOSS	LOSS	LOSS	LOSS	LOSS	LOSS	LOSS	normal	LOSS	LOSS	LOSS	LOSS	LOSS	normal	normal	normal	normal	normal	normal	normal	MET	MET	normal	MET	normal	normal	normal	MET	normal	MET
SUS_085	normal	normal	LOSS	normal	normal	LOSS	LOSS	LOSS	normal	normal	normal	normal	LOSS	normal	LOSS	normal	LOSS	LOSS	normal	LOSS	LOSS	normal	normal	normal	LOSS	LOSS	normal	LOSS	normal	normal	LOSS	LOSS	normal	normal	normal	normal	normal	normal	normal	MET	MET	MET	MET	MET	MET	normal	MET	normal	MET
SUS_086	LOSS	LOSS	LOSS	normal	normal	normal	normal	LOSS	normal	normal	normal	normal	normal	normal	normal	normal	normal	LOSS	LOSS	LOSS	LOSS	normal	normal	normal	LOSS	LOSS	normal	LOSS	LOSS	LOSS	LOSS	LOSS	MET	MET	MET	MET	MET	MET	MET	MET	MET	MET	MET	MET	MET	MET	MET	normal	normal
SUS_087	normal	LOSS	LOSS	normal	normal	normal	normal	normal	normal	normal	LOSS	normal	normal	normal	normal	normal	normal	LOSS	normal	normal	normal	normal	normal	normal	LOSS	LOSS	normal	LOSS	normal	LOSS	normal	LOSS	MET	MET	MET	MET	MET	MET	normal	MET	MET	MET	MET	MET	MET	MET	MET	MET	normal
SUS_088	LOSS	LOSS	normal	normal	normal	normal	normal	LOSS	LOSS	normal	LOSS	LOSS	normal	normal	normal	normal	normal	LOSS	LOSS	LOSS	normal	LOSS	LOSS	LOSS	normal	normal	normal	normal	normal	normal	normal	LOSS	MET	MET	MET	normal	normal	normal	normal	MET	MET	MET	MET	MET	MET	normal	normal	normal	normal
SUS_089	LOSS	LOSS	normal	normal	normal	normal	normal	normal	normal	normal	normal	normal	normal	normal	normal	normal	normal	LOSS	LOSS	LOSS	normal	normal	normal	normal	normal	LOSS	normal	LOSS	normal	normal	normal	LOSS	MET	normal	normal	normal	MET	normal	normal	normal	MET	normal	normal	MET	normal	normal	normal	MET	normal
SUS_094	normal	normal	LOSS	normal	normal	normal	normal	LOSS	normal	normal	normal	normal	LOSS	normal	LOSS	normal	normal	LOSS	normal	LOSS	LOSS	normal	normal	normal	LOSS	LOSS	normal	LOSS	normal	LOSS	LOSS	LOSS	MET	MET	MET	normal	normal	normal	normal	MET	MET	MET	MET	MET	MET	MET	MET	MET	normal
SUS_096	normal	normal	normal	normal	normal	LOSS	normal	LOSS	normal	LOSS	normal	normal	LOSS	normal	LOSS	normal	LOSS	LOSS	normal	LOSS	LOSS	normal	normal	normal	normal	LOSS	normal	normal	normal	normal	LOSS	LOSS	normal	normal	normal	MET	MET	MET	normal	MET	MET	MET	MET	MET	normal	normal	normal	normal	normal
SUS_103	normal	LOSS	LOSS	normal	normal	LOSS	normal	LOSS	normal	LOSS	normal	normal	LOSS	LOSS	LOSS	LOSS	LOSS	LOSS	normal	LOSS	LOSS	normal	normal	normal	LOSS	LOSS	normal	LOSS	LOSS	LOSS	LOSS	LOSS	MET	MET	MET	MET	MET	MET	MET	MET	MET	MET	MET	MET	MET	normal	MET	MET	normal
SUS_104_re	normal	LOSS	normal	normal	normal	normal	normal	normal	normal	normal	normal	normal	normal	normal	normal	normal	normal	LOSS	LOSS	LOSS	LOSS	LOSS	LOSS	LOSS	LOSS	normal	normal	LOSS	normal	normal	normal	normal	normal	normal	MET	normal	normal	normal	normal	normal	normal	MET	normal	MET	normal	normal	normal	normal	normal
SUS_111	LOSS	LOSS	LOSS	normal	normal	normal	normal	LOSS	LOSS	LOSS	LOSS	LOSS	LOSS	normal	LOSS	normal	normal	LOSS	LOSS	LOSS	normal	normal	normal	normal	normal	LOSS	normal	normal	normal	normal	LOSS	LOSS	normal	normal	MET	normal	normal	normal	normal	MET	MET	MET	MET	MET	normal	normal	normal	normal	normal
SUS_125	normal	normal	LOSS	normal	normal	LOSS	normal	LOSS	normal	LOSS	normal	normal	LOSS	normal	LOSS	normal	LOSS	LOSS	LOSS	LOSS	LOSS	LOSS	LOSS	LOSS	LOSS	LOSS	normal	LOSS	LOSS	LOSS	LOSS	LOSS	normal	MET	MET	normal	normal	normal	normal	MET	MET	normal	normal	MET	normal	normal	normal	normal	normal
SUS_130	normal	normal	normal	normal	normal	normal	normal	LOSS	normal	LOSS	normal	normal	LOSS	normal	LOSS	normal	normal	LOSS	normal	LOSS	LOSS	LOSS	LOSS	LOSS	normal	LOSS	normal	LOSS	normal	normal	LOSS	LOSS	normal	normal	MET	normal	normal	normal	normal	MET	MET	MET	MET	MET	normal	normal	normal	normal	normal
SUS_142	LOSS	normal	normal	normal	normal	normal	normal	normal	normal	normal	normal	normal	normal	normal	normal	normal	normal	normal	LOSS	normal	normal	normal	normal	normal	normal	normal	normal	LOSS	normal	normal	normal	LOSS	normal	normal	normal	MET	normal	normal	normal	MET	MET	MET	normal	MET	normal	normal	normal	normal	normal
SUS_154	normal	normal	normal	normal	normal	normal	normal	LOSS	LOSS	normal	normal	normal	normal	normal	normal	normal	normal	normal	LOSS	normal	normal	normal	normal	normal	normal	normal	LOSS	normal	normal	normal	normal	LOSS	normal	normal	MET	normal	normal	normal	normal	MET	MET	MET	MET	MET	MET	normal	MET	normal	MET
SUS_158	LOSS	normal	LOSS	normal	normal	normal	normal	LOSS	normal	LOSS	normal	normal	LOSS	normal	normal	normal	normal	LOSS	normal	LOSS	normal	normal	normal	normal	normal	normal	normal	normal	LOSS	LOSS	LOSS	LOSS	normal	normal	MET	normal	normal	normal	normal	MET	MET	MET	MET	normal	normal	MET	normal	normal	normal
SUS_162_re	LOSS	normal	LOSS	normal	normal	normal	normal	normal	normal	normal	normal	normal	normal	normal	normal	normal	normal	LOSS	LOSS	LOSS	normal	normal	normal	normal	normal	normal	normal	normal	LOSS	normal	normal	normal	MET	MET	MET	MET	MET	MET	MET	MET	MET	MET	MET	MET	MET	MET	MET	normal	MET
SUS_169	normal	normal	LOSS	LOSS	LOSS	LOSS	LOSS	LOSS	LOSS	LOSS	LOSS	LOSS	LOSS	LOSS	LOSS	LOSS	LOSS	LOSS	LOSS	LOSS	normal	normal	normal	normal	LOSS	LOSS	LOSS	LOSS	normal	normal	LOSS	LOSS	normal	normal	normal	normal	normal	normal	normal	MET	MET	MET	MET	MET	MET	normal	MET	MET	normal
SUS_175	normal	normal	LOSS	normal	normal	normal	normal	LOSS	normal	normal	normal	normal	LOSS	normal	LOSS	normal	LOSS	LOSS	normal	LOSS	LOSS	normal	normal	normal	LOSS	LOSS	normal	LOSS	normal	LOSS	LOSS	LOSS	normal	MET	normal	normal	normal	normal	normal	MET	MET	MET	MET	MET	normal	normal	normal	normal	normal
SUS_189	LOSS	LOSS	LOSS	normal	normal	normal	normal	normal	normal	normal	normal	normal	normal	normal	normal	LOSS	normal	LOSS	LOSS	LOSS	normal	LOSS	normal	LOSS	normal	normal	normal	normal	LOSS	normal	normal	LOSS	normal	normal	normal	normal	normal	normal	normal	MET	MET	MET	MET	normal	normal	normal	normal	normal	MET
SUS_190	normal	LOSS	LOSS	normal	normal	normal	normal	LOSS	normal	normal	normal	normal	LOSS	normal	normal	normal	normal	LOSS	LOSS	LOSS	LOSS	normal	normal	normal	LOSS	LOSS	normal	LOSS	normal	normal	LOSS	LOSS	MET	MET	MET	normal	normal	normal	normal	MET	MET	MET	MET	MET	MET	normal	MET	MET	normal
SUS_209	LOSS	LOSS	normal	normal	normal	normal	normal	normal	normal	normal	LOSS	LOSS	normal	normal	normal	LOSS	normal	LOSS	LOSS	LOSS	normal	normal	normal	LOSS	normal	LOSS	LOSS	LOSS	normal	normal	normal	LOSS	MET	MET	MET	MET	normal	normal	normal	MET	MET	MET	MET	MET	MET	MET	MET	normal	normal
SUS_223	LOSS	LOSS	LOSS	normal	normal	normal	normal	LOSS	LOSS	LOSS	LOSS	LOSS	LOSS	normal	normal	normal	normal	LOSS	LOSS	LOSS	normal	normal	normal	normal	LOSS	LOSS	LOSS	LOSS	LOSS	LOSS	normal	LOSS	normal	normal	normal	normal	normal	normal	normal	MET	MET	normal	normal	normal	normal	normal	MET	MET	normal
SUS_231_re	LOSS	normal	normal	normal	normal	normal	normal	LOSS	normal	normal	normal	normal	LOSS	normal	normal	normal	normal	LOSS	LOSS	LOSS	normal	normal	normal	normal	normal	normal	normal	LOSS	LOSS	LOSS	LOSS	normal	normal	normal	MET	normal	normal	normal	normal	normal	MET	MET	MET	MET	normal	normal	normal	normal	normal
SUS_256	LOSS	LOSS	LOSS	normal	normal	normal	normal	LOSS	normal	normal	normal	normal	normal	normal	LOSS	normal	normal	LOSS	LOSS	LOSS	LOSS	LOSS	LOSS	LOSS	normal	normal	normal	normal	normal	normal	normal	LOSS	normal	normal	normal	MET	MET	normal	normal	MET	MET	MET	MET	MET	normal	normal	normal	normal	MET
SUS_258_re	LOSS	LOSS	LOSS	normal	normal	normal	normal	normal	normal	normal	normal	normal	normal	normal	normal	normal	normal	LOSS	LOSS	LOSS	normal	normal	normal	normal	normal	normal	normal	normal	LOSS	LOSS	LOSS	normal	MET	MET	MET	MET	MET	MET	MET	MET	MET	MET	MET	MET	MET	MET	MET	normal	MET
SUS_282	normal	normal	LOSS	normal	normal	normal	normal	LOSS	normal	normal	normal	normal	LOSS	normal	LOSS	normal	LOSS	LOSS	LOSS	LOSS	LOSS	normal	normal	normal	normal	LOSS	normal	LOSS	LOSS	LOSS	LOSS	LOSS	MET	normal	normal	normal	normal	normal	normal	MET	MET	MET	MET	MET	normal	normal	normal	normal	normal
SUS_062 normal	normal	normal	normal	normal	normal	normal	normal	normal	normal	normal	normal	normal	normal	normal	normal	normal	normal	normal	normal	normal	normal	normal	normal	normal	normal	normal	normal	normal	normal	normal	normal	LOSS	normal	normal	MET	normal	normal	normal	MET	normal	normal	MET	normal	MET	normal	normal	normal	normal	normal
[truncated: 16 more columns]
